# Supplementary material for: The dimerization interface in VraR is essential for induction of the cell wall stress response in Staphylococcus aureus: a potential druggable target
Source: PubMed Central journal article supplement (PMC6612188; doi:10.1186/s12866-019-1529-0), 2019-07-05
Supplement: 12866_2019_1529_MOESM1_ESM.pdf [file 12866_2019_1529_MOESM1_ESM.pdf]

## Additional File 1

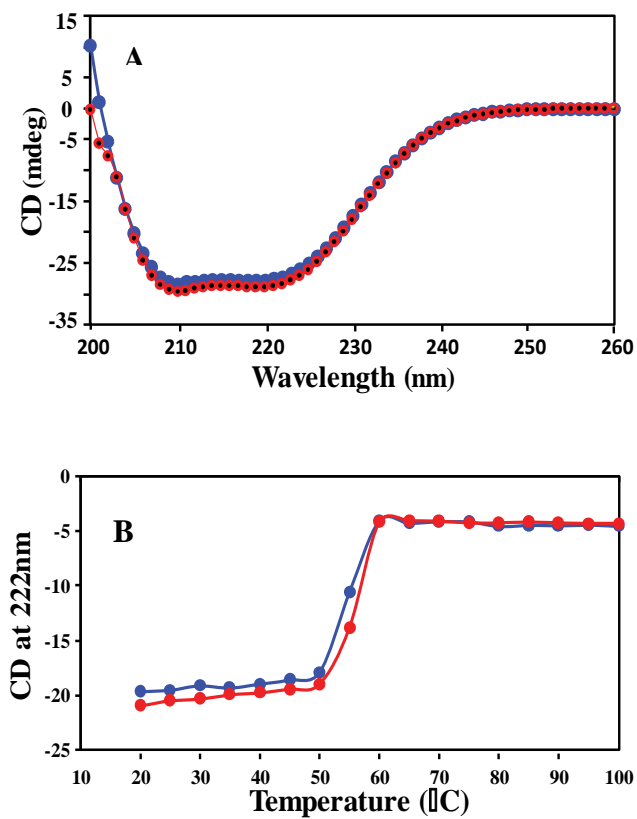

Fig. S1 The CD spectra (A) and thermal melting spectra (B) of VraR (blue solid circles) and VraRM13A (red solid circles).
