# Supplementary material for: The dimerization interface in VraR is essential for induction of the cell wall stress response in Staphylococcus aureus: a potential druggable target
Source: PubMed Central journal article supplement (PMC6612188; doi:10.1186/s12866-019-1529-0), 2019-07-05
Supplement: 12866_2019_1529_MOESM2_ESM.pdf [file 12866_2019_1529_MOESM2_ESM.pdf]

## Additional File 2

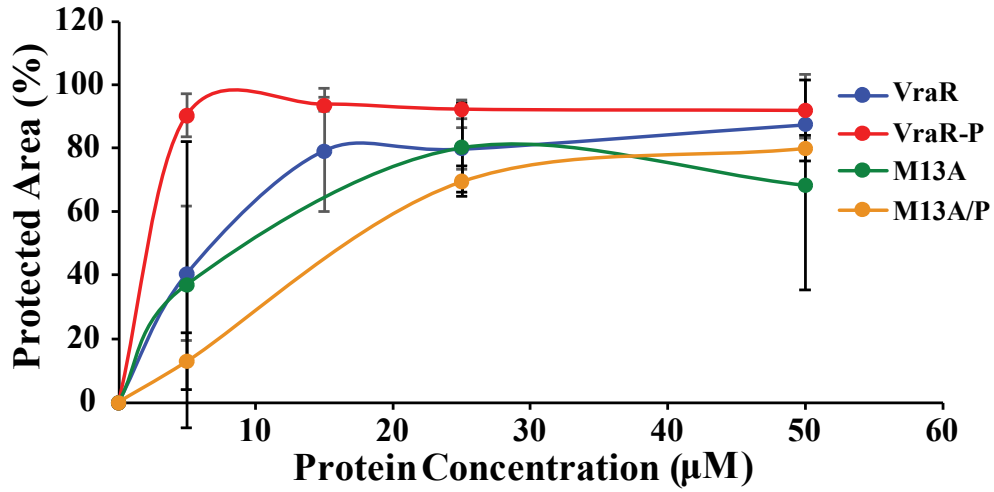

Fig. S2 Binding isotherms of VraR, VraR-P, VraRM13A and acetyl-phosphate-treated VraRM13A (VraRM13A/P). Three DNA bands from the DNase I footprinting gel, located in the VraR-protected region were used to assess VraR binding to DNA. ImageJ was used to quantify the DNA bands.
